# Nuclear morphogenesis: forming a heterogeneous nucleus during embryogenesis

Albert Tsai<sup>1,†</sup> & Justin Crocker<sup>1,†</sup>.

<sup>1</sup> European Molecular Biology Laboratory, Heidelberg, Germany

† Co-corresponding authors: A.T. [albert.tsai@embl.de](mailto:albert.tsai@embl.de) J.C. [justin.crocker@embl.de](mailto:justin.crocker@embl.de)

## Summary statement

We observed that the nuclear space becomes progressively heterogeneous during embryo development, forming distinct transcriptional sub-nuclear environments, paralleling the partitioning of the embryo body during morphogenesis.

## Abstract

An embryo experiences increasingly complex spatial and temporal patterns of gene expression as it matures, guiding the morphogenesis of its body. Using super-resolution fluorescence microscopy in *Drosophila melanogaster* embryos, we observed that the nuclear distributions of transcription factors and histone modifications undergoes a similar transformation of increasing heterogeneity. This spatial partitioning of the nucleus could lead to distinct local regulatory environments in space and time tuned for specific genes. Accordingly, transcription sites driven by different *cis*-regulatory regions each had their own temporally and spatially varying local histone environments, which could facilitate the finer spatial and temporal regulation of genes to consistently differentiate cells into organs and tissues. Thus, “nuclear morphogenesis” may be a microscopic counterpart of the macroscopic process that shapes the animal body.

© 2022. Published by The Company of Biologists Ltd.

This is an Open Access article distributed under the terms of the Creative Commons Attribution License (<http://creativecommons.org/licenses/by/4.0>), which permits unrestricted use, distribution and reproduction in any medium provided that the original work is properly attributed.

## Introduction

During embryogenesis, transcriptional regulation controls the expression of genes that pattern the animal body (Long et al., 2016; Mallo and Alonso, 2013; Reiter et al., 2017; Spitz and Furlong, 2012). This process involves interactions between transcription factors (TFs), chromatin regulators, and genome topology. Genome-wide assays have revealed a diversity of regulatory elements and the factors that bind them (Consortium, 2012; Johnson et al., 2007; Kundaje et al., 2015; Stunnenberg et al., 2016; Thurman et al., 2012). Notably, these assays have detected reorganizational changes within the nucleus during cellular differentiation, where longer range interactions consolidate chromatin regions and genes into Topologically Associated Domains (TADs). These observations suggest that cellular differentiation involves transforming the nucleus from a uniform compartment into a heterogeneous and partitioned space. However, these maps represent averages over populations of cells and therefore mask cellular and regulatory heterogeneity. There is now recognition that cell-to-cell variation of TFs, chromatin modifications, and interactions between regulatory elements are critical for animal development (Furlong and Levine, 2018; Shema et al., 2019; Tanay and Regev, 2017). However, a challenge in the field has been to pair single-cell and genomics techniques with complex tissues and developmental systems.

Improvements in imaging technology are advancing the capability to measure regulatory interactions in developmental systems at the single cell and locus level (Chen et al., 2018; Garcia et al., 2013; Lim et al., 2018; Mir et al., 2017, 2018; Tsai et al., 2017). These techniques can spatially trace genome structures at high resolution (Bintu et al., 2018; Mateo et al., 2019; Shema et al., 2019), allowing direct observations of the transcriptional environments around individual gene loci in specific cells. We have previously found that the distributions of TFs were heterogeneous in the nuclei of *Drosophila* embryos at a late stage of development and that the developmental gene *shavenbaby* (*svb*) resided in regions enriched for TFs when it is transcriptionally active (Tsai et al., 2017).

However, the origins and spatial-temporal behaviors of these transcriptional microenvironments during development remain unclear. When do nuclear microenvironment form? How and when do genes interact with these microenvironments? Here, we imaged the distributions of TFs and histone modifications in *Drosophila melanogaster* embryos across development. Additionally, we imaged histone modifications at transcription sites driven by *hunchback* (*hb*), *rhomboid* (*rho*), and *snail* (*sna*) enhancers to measure their local chromatin environment during different stages of development and at different locations on the embryo. In sum, we found that the distributions of TFs and epigenetic marks became progressively heterogeneous as development proceeded. Thus, the nuclear space may undergo a transformation that parallels morphogenesis, where the animal body becomes increasingly heterogeneous and segmented. Additionally, even for the same gene, the nuclear environments at transcription sites depended on the location and timing of expression. Organizing the nucleus to form multiple reconfigurable regulatory environments in a single nucleus could permit genes to perform different tasks at different times and facilitate the complicated regulatory patterns during later stages of embryogenesis.

## Results and Discussions

### Increasing heterogeneity of TF distributions as development progresses

Hunchback (Hb) is a TF that is a gap gene in the early embryo (Nüsslein-Volhard and Wieschaus, 1980). We observed that Hb established the classical pattern at stage 5 (Figure 1A). Hb expression moved into neuroblasts at stage 8 (Figure 1B) and into the ventral nerve cord at stage 14 (Figure 1C) (Kambadur et al., 1998). To investigate if the nuclear distribution of Hb also undergoes a broad-to-specific transition during development, we stained for Hb using immunofluorescence (IF, “Immunofluorescence staining” in Materials and Methods) and imaged its distributions using high-resolution confocal microscopy with AiryScan (Sheppard et al., 2013) (Figure 1D-F, see “Confocal and AiryScan microscopy” in Materials and Methods).

To quantify the spatial distributions of Hb, we computed the spatial autocorrelation of Hb intensity (Figure 1G, “Image analysis” in Materials and Methods). The level of correlation (y-axis) when the image has been shifted by a given distance compared to the original (x-axis) indicates the abundance of structures at that length scale (see Figure S1A-C and its legends for how to interpret autocorrelation plots). There was a monotonous increase in autocorrelation as the embryo ages, suggesting that Hb environments spanning several hundred nanometers became more prevalent as development progressed. Indeed, STED (Blom and Widengren, 2017) (“STED microscopy” in Materials and Methods) imaging showed that at stage 5 (Figure 1H, bottom), Hb was uniformly distributed across the nucleus. At stage 8 (Figure 1H, middle), Hb began to coalesce into distinct nuclear regions. At stage 14 (Figure 1H, top), this heterogeneity progressed further, with regions of high Hb concentration next to regions with almost no Hb. We also imaged Krüppel (Kr, Figure S1D) distributions across similar developmental stages with AiryScan and computed their autocorrelation (Figure S1E). There was a similar upward trend, suggesting the formation of local TF environments in older embryos.

The TFs Ultrabithorax (Ubx, Figure S1F-G) and Engrailed (En, Figure S1H-I), which are active within a narrower time frame during development, showed high autocorrelation when they are first expressed (stage 10) and when they reach maximum expression (stage 14) in nuclei on the ectoderm. At stage 16, when both are no longer expressed, their distributions became sparse with low autocorrelation. This two-state behavior for factors only expressed at later stages of development is unlike Hb and Kr, where they showed a progressive increase in autocorrelation with intermediate states. This suggests that the general distributive properties of TFs may conform to the underlying nuclear architecture at the time of their expression.

## Increasing heterogeneity of histone modifications as development progresses

Because TFs interact with DNA, we suspected that the state of the chromatin would influence where factors localize. We therefore imaged histone modifications associated with different chromatin features using high-resolution confocal microscopy to track their spatial distributions. We focused on the ventral ectodermal region where *hunchback* (*hb*) is expressed (located using *hbBAC* transcription sites, see the next section) and imaged embryos at stages 5 and 10, in nuclei within 20  $\mu\text{m}$  of the ectoderm to preserve optical resolution. We

stained for H3K4me1 (Figure 2A, enhancers), H3K4me3 (Figure 2B, promoters), H3K27ac (Figure 2C, active promoters and enhancers), H3K36me3 (Figure 2D, active gene bodies), and H3K27me3 (Figure 2E, repressed regions) using IF.

In general, the trend was an increasing intensity of histone modifications as the embryo aged from stage 5 to 10 (Figure 2A-E). H3K27me3 increased the most, which went from barely detectible to condensed regions with very high intensities. The autocorrelation functions of all histone modifications (Figure 2F-J) increased across all length scales. H3K27me3 (Figure 2J) showed the largest change followed by H3K4me3 (Figure 2G). Overall, histone modifications became established and spatially heterogeneous in older embryos, with repressive modifications showing the strongest increase.

## Changing histone modifications around transcription sites over time

Changing histone modification patterns over time could alter the chromatin environments around genes active across multiple developmental stages, such as *hunchback* (*hb*). However, using RNA fluorescence *in situ* hybridization (FISH) to detect transcription sites degraded the signal from histone modifications (Figure S2A&B, “FISH with post-fixation” in Material and Methods). To improve quantitative image analysis, we detected transcription sites without the denaturing step in RNA FISH to preserve the signal from histone modifications (Figure 3A). In brief, we crossed a *Drosophila melanogaster* line expressing a reporter mRNA containing MS2 stem loops driven by 18 kbps of the *cis*-regulatory region of *hb* (*hbBAC*) (Bothma et al., 2015) with a line expressing MCP-EGFP to label the mRNA with GFP (Garcia et al., 2013) (“Fly lines” in Materials and Methods). This specific cross was used for live imaging of *hb* expression kinetics in stage 5 embryos (Bothma et al., 2015). The mRNA transcription signal was then amplified using IF against GFP, in conjunction with staining for histone modifications (Figure S2C&D for H3K4me3 and Figure 3B-E for H3K4me1 and H3K27me3). Transcription sites for *hbBAC* appeared in a radial band toward the anterior of stage 5 embryos and in neuroblasts in stage 10 embryos, consistent with the localization of Hb in Figure 1A&B.

To quantify the spatial distribution of histone marks around transcription sites, we computed the average radial intensity distribution centered on the transcription site (Figure 3F-J), according to (Tsai et al., 2017) with the modification described in “Image processing” in Materials and methods. We observed a clear increase in H3K4me1 between stages 5 and 10 (Figure 3F), while H3K4me3 (Figure 3G) only showed a small increase and was high at both stages, which is the opposite of their global trend (Figure 2F&G). H3K27ac (Figure 3H) did not change, but H3K36me3 (Figure 3I) showed a moderate increase. Interesting, some histone modifications showed an initial dip in intensity. The repressive mark H3K27me3 (Figure 3J) had a different functional form, with no initial dip and a gentle downward slope. There was little change between stages 5 and 10, despite the increase in H3K27me3 throughout the nucleus going from stage 5 to 10 (Figure 2J). In sum, the histone environment around *hbBAC* transcription sites between stages 5 and 10 showed changes distinct from the global trend in Figure 2F-J.

To test if we can resolve finer temporal changes in local histone environments, we focused on the hour-long cellularization process at end of the rapid nuclear division cycles at stage 5 (Lecuit and Wieschaus, 2000), which we divide into three phases: early, mid, and late (Figure S3A). We generated transgenic lines with MS2 reporter mRNA driven by enhancers from two genes active during this process: *snail* (*sna*) and *rhomboid* (*rho*) (“Fly lines” and “Enhancer sequences” in Materials and Methods). The constructs are named *sna A2.2 W0.10* and *rhoNEE*, respectively. We observed that both expressed in patterns corresponding to their endogenous genes (Hammonds et al., 2013; Tomancak et al., 2002, 2007) (Figure S3B): in an anterior-posterior band along the ventral side for *sna A2.2 W0.10* (Ip et al., 1992a) and in lateral stripes for *rhoNEE* (Ip et al., 1992b). At *sna A2.2 W0.10* transcription sites, we detected a progressive increase for both histone marks across cellularization (Figure S3C&D). *rhoNEE*, on the other hand, showed no change in H3K4me1 (Figure S3E) and an increase in H3K4me3 only between early and mid cellularization (Figure S3F). Thus, the regulatory environments around genes can change over relatively short time scales in a manner that depends on their *cis*-regulatory regions.

## Changes in the histone environment at *rhoNEE* transcription sites over space

After observing that histone environments at transcription sites changed over time, we investigated if these environments also change based on the location of the cell in relationship to regulatory inputs of *rho*. The *rho* stripe (Figure 4A, using *rhoNEE*) has a sharp ventral edge resulting from Snail repression and trails off gradually in the dorsal direction due to a decreasing gradient of the activator Dorsal (Figure 4B) (Ip et al., 1992b). Using *rhoNEE*, we observed that while most transcriptionally active cells are in the active region (Figure 4C, “Active”), some active nuclei could still be observed in the repressed region (Figure 4C, “Rep.”). We quantified H3K4me1 and H3K4me3 at *rhoNEE* transcription sites (Figure 4D), sorting cells based on their location in the *rho* expression pattern (e.g. Figure 4E&F) from stage 5 embryos at early cellularization. We observed that transcription sites in the active region had a higher level of H3K4me1 compared to sites in the repressed region (Figure 4G). In contrast, there was no difference in H3K4me3 (Figure 4H). Thus, the local histone environment of a gene could vary based on the time and place of its expression, potentially reflecting changes in the states of its regulatory elements.

## “Nuclear morphogenesis” is integral to developmental gene regulation

During development, the embryo experiences changes in its gene regulation profiles, adapting to different regulatory needs. Early on during development, cell division occurs quickly and TFs form multi-cell gradients with uniform nuclear distributions (Figure 4I). This stage up to gastrulation lasts approximately 3 hours in *D. melanogaster* embryos. Subsequently, the division slows down and segmentation of the body takes place. This phase lasts approximately 18 hours. During this time, many regulatory and signaling pathways for different cell types, tissues, and organs become active, leading to a potentially complicated regulatory environment in the nucleus (Figure 4J). We observed that the expression patterns of TFs became lineage-specific and their nuclear distributions, heterogeneous. For TFs that regulate different genes during later stages of development, this spatial partitioning could separate them from early genes and provide another layer of safety beyond repression to prevent accidental cross-activation.

As TFs interact with DNA, their general nuclear distributions could reflect changes in the chromatin environment. Starting from the beginning of zygotic gene expression, the levels of histone modifications increase at specific regions on the genome. This occurs concurrently to the establishment of TADs and to the chromatin organizing into distinct transcriptionally active or repressed regions (Matharu and Ahituv, 2015). We observed such increases in active and repressive histone modifications. The increase in H3K27me3, associated with the polycomb group proteins (Denholtz et al., 2013), was the most drastic, which could be differentiating cells shutting down genomic regions. As chromatin accessibility may drive sub-nuclear compartmentalization (McSwiggen et al., 2019), this change in chromatin organization could create distinct accessibility patterns that guide TFs into heterogeneous distributions. These changes in the distributions of TFs and chromatin states across development could alter the regulation of genes depending on the timing of their expression.

To quantitatively measure temporal and spatial variations in histone environments around genes, we utilized constructs with MS2 reporter mRNAs. We verified that their expression patterns matched their endogenous counterparts in the developmental stages we observed. Nevertheless, to make specific statements regarding the spatial-temporal behaviors, regulatory properties, and functions of endogenous genes, future experiments would ideally tag endogenous genes and decouple position tracking from transcriptional activity to observe both active and repressive microenvironments.

Over time scales of hours, we observed an increase in H3K4me1 near active *hbBAC* transcription sites between stage 5 and 10 embryos. In contrast, the levels of H3K4me3 were high in both younger and older embryos. This suggests that the promoter is utilized at similar levels during both stages. In contrast, enhancers, especially ones not immediately next to the promoter, may not have sufficient time to interact with the promoter in the early embryo due to the rapid division cycle and relative lack of structure in the nucleus. As the nuclear environment becomes more stable and heterogeneous in older embryos, longer-distance interactions could form, bringing more or different enhancers into play. For genes active during multiple developmental stages, a changing set of regulatory elements over time due to kinetic constraints may permit them to respond to different regulatory inputs and serve multiple roles using the same *cis*-regulator region.



Inside an hour, we observed that the histone environments at transcription sites of *sna A2.2 W0.10* and *rhoNEE* could still vary. The upward trend of H3K4me3 for both constructs during cellularization could indicate the ramp-up of transcriptional activity in general. Although both constructs share the same *hbP2* promoter, there is still a difference in the time trajectory of H3K4me3, potentially stemming from their different enhancers. Notably, the *rhoNEE* minimal enhancer is about 300 bps while the *sna A2.2 W0.10* construct contains a longer enhancer of about 2 kbps from *sna* (Perry et al., 2010). The short enhancer of *rhoNEE* available for H3K4me1 deposition could mean that small changes in H3K4me1 level is below the detection threshold whereas *sna A2.2 W0.10* has a much more space for H3K4me1 to accumulate. Interestingly, *hbBAC* that showed a clear change in H3K4me1 contains a *cis*-regulatory region of about 18 kbps with potentially multiple enhancers (Perry et al., 2011). In addition, we observed variations in the *rhoNEE* histone environments depending on where the cell is located, consistent with the regulatory inputs of *rhoNEE*: the changing H3K4me1 but constant H3K4me3 suggests a shared active promoter (*hbP2* in our construct) but differential engagement from enhancers depending on if the repressor Snail is present. Together, these results imply that histone environments around genes depend on the properties and states of *cis*-regulatory elements. These differences could refine expression patterns over time, as is the case for many developmental genes (Briscoe and Small, 2015), where differences in local epigenetic marking could guide incorrectly expressing or silent cells into their proper state.

In conclusion, this survey of the distributions of TFs and histone modifications in *Drosophila* embryos has provided evidence for the emergence of a heterogeneous nucleus during development. This transformation of the nuclear space may parallel morphogenesis where the embryo body becomes increasingly complex. Thus, our work suggests that “nuclear morphogenesis” is a promising hypothesis that should be further tested and refined. Through investigating the interactions between nuclear environment and gene regulation beyond gastrulation, we could gain insights into how the changing spatial architecture of the nucleus alters the strategies of gene regulation during later stages of embryo development. The ability to coordinate multiple lineage-, location-, and time-specific environments in a single nucleus could facilitate gene regulation to ensure consistent cellular differentiation and the emergence of a robust developmental process.

Spatial partitioning at both microscopic and macroscopic scales could be a common strategy in multi-cellular organisms to separate or coordinate regulatory processes that spans multiple length and time scales.

## Materials and methods

### Fly lines

All *Drosophila melanogaster* strains were maintained under standard laboratory conditions at 23 °C. The line containing the *cis*-regulatory region (18 kpbs) of *hunchback* (*hb*) on a bacterial artificial chromosome (BAC) driving a *yellow* reporter mRNAs containing 24 MS2 stem loops generated in (Bothma et al., 2015) for live imaging was used as a readout for the expression of *hb*. The reporter constructs for *rhoNEE* and *sna A2.2 W0.10* were derived from the plasmid pIB-hbP2-P2P-lacZ- $\alpha$ Tub3 UTR (Chen et al., 2012) with the *hbP2* enhancer between the restriction sites HindIII and Ascl replaced with the *rhoNEE* or the *sna A2.2 W0.10* sequence. The *hbP2* promoter was kept. The plasmids were synthesized by Genscript (Piscataway, New Jersey, USA). The constructs were injected into Bloomington *Drosophila* Stock Center line 27388 and integrated using RMCE by GenetiVision (Houston, Texas, USA). Virgin flies from a transgenic *D. melanogaster* line containing MS2 coat protein (MCP) fused to EGFP driven by the *nanos* promoter from (Garcia et al., 2013) were crossed with males from the *hbBAC*, the *rho*, or the *sna A2.2 W0.10* reporter line to label transcriptions sites for further amplification using immunofluorescence (IF) staining. The MCP-EGFP line does not contain a nuclear localization signal (NLS) to minimize MCP-EGFP forming aggregates in the nucleus in the absence of MS2 mRNAs.

### Enhancer sequences

*rhoNEE*:

```
CTTGGGCAGGATGGAAAAATGGGAAAAACATGCGGTGGGAAAAACACACATCGCGAAACATTTGGCGCAACTTGCGGAAGAC  
AAGTGC GGCTGCAACAAAAAGTCGCGAAACGAACTCTGGGAAGCGGAAAAAGGACACCTTGCTGTGCGGCGGGAAGCGCA
```



The primary antibodies and their dilution ratios were:

Hb: rabbit, Generated for the Berkeley Drosophila Transcription Network Project (Li et al., 2008), (1:100)

Kr: rabbit, Generated for the Berkeley Drosophila Transcription Network Project (Li et al., 2008), (1:100)

Ubx: mouse, Developmental Studies Hybridoma Bank, FP3.38-C, (1:20)

En: rabbit, Santa Cruz Biotechnology, (d-300), sc-28640, (1:50)

GFP: mouse, ThermoFisher, GFP Monoclonal Antibody (3E6), A-11120, (1:500)

H3K4me1: rabbit, Merck, Anti-monomethyl-Histone H3 (Lys4) Antibody, 07-436, (1:250)

H3K4me3: rabbit, Cell-Signaling Technology, Tri-Methyl-Histone H3 (Lys4) (C42D8) Rabbit mAb, 9751, (1:250)

H3K27ac: rabbit, Active Motif, Histone H3K27ac antibody (pAb), 39133, (1:250)

H3K27me3: rabbit, Active Motif, Histone H3K27me3 antibody (pAb), 39157, (1:250)

H3K36me3: rabbit, abcam, Anti-Histone H3 (tri methyl K36) antibody, ab194677, (1:250)

The secondary antibodies were:

Alexa488 donkey anti-mouse: Invitrogen, A21202, (1:500)

Alexa488 donkey anti-rabbit, Invitrogen, A21206, (1:500)

Alexa555 donkey anti-rabbit, Invitrogen, A31572, (1:500)

Alexa594 donkey anti-mouse, Invitrogen, A21203, (1:500)

STAR RED goat anti-rabbit, Abberior, 2-0012-005-8, (1:250)

## FISH with post-fixation

To stain for transcription sites using RNA fluorescence *in situ* hybridization (FISH) and histone modifications using IF, we followed the FISH protocol in (Crocker et al., 2015; Tsai et al., 2017) and the IF protocol from the above section with the following modifications. The samples were first stained for the histone modification following the IF protocol, re-fixed in 5% PFA in PBT (PBS with 0.1% Tween 20) for 20 minutes, and then stained for *hb* following the FISH protocol.

One additional primary antibody was used for the RNA FISH protocol:

Sheep anti-DIG: Roche, 11333089001, (1:250)

One additional secondary antibody was used:

Alexa488 donkey anti-sheep: Invitrogen, A11015, (1:500)

## Confocal and Airyscan microscopy

Confocal and Airyscan (Sheppard et al., 2013) imaging followed the protocols in (Tsai et al., 2017). Specifically, mounting of fixed *Drosophila* embryos was done in ProLong Gold + DAPI (Invitrogen, P36935). Fixed embryos at the appropriate stage and orientation were imaged on a Zeiss LSM 880 confocal microscope with FastAiryscan (Carl Zeiss Microscopy, Jena, Germany). Excitation lasers with wavelengths of 405, 488 and 561 nm were used as appropriate for the specific fluorescent dyes. Whole-embryo overviews were imaged using a Zeiss LD LCI Plan-Apochromat 25x/0.8 Imm Korr DIC M27 objective. High resolution confocal and Airyscan stacks were imaged using a Zeiss Plan-Apochromat 63x/1.4 Oil DIC M27 objective. The optimal resolution as recommended by the Zen software from Zeiss was used for the x-y (70.6 nm for confocal and 42.5 nm for Airyscan) and z direction (320 nm for confocal and 190 nm for Airyscan) of stacks used for quantification. The laser power and gain were adjusted to maximize the signal to noise ratio within the dynamic range of the PMT or Airyscan detector for each sample preparation condition (i.e. different antibodies). Within a given sample preparation condition, laser power and gain

were kept the same across embryos. The acquired Airyscan stacks were processed with Zen 2.3 SP1 (Carl Zeiss Microscopy, Jena, Germany) in 3D mode to obtain super-resolved images.

## STED microscopy

Mounting of fixed *Drosophila* embryos was done in ProLong Diamond without DAPI (Invitrogen, P36961). Fixed embryos at the appropriate stage and orientation were imaged on a STEDYCON (Abberior Instruments, Göttingen, Germany) in 2D STED mode on an Olympus BX53 microscope (Olympus, Tokyo, Japan). Excitation lasers with wavelengths of 594 and 640 nm were used as appropriate for the specific fluorescent dyes. The wavelength of the STED laser was 775 nm. All samples were imaged using an Olympus UPlanSApo 100X Oil/1.4 objective. The resolutions used for the x-y and z direction were 25 nm and 250 nm, respectively. The laser power and gain were adjusted to maximize the signal to noise ratio within the dynamic range of the APD detector on the STEDYCON for each sample preparation condition. Within a given sample preparation condition, laser power and gain were kept the same across embryos.

## Image processing

Image processing was done using Fiji (Schindelin et al., 2012) with the 3D ImageJ Suite plugin (Schmid et al., 2010). Image processing to obtain radially averaged intensity distributions around transcription sites was done according to (Tsai et al., 2017), with the following modification to signal normalization: for each transcription site, the maximum intensity measured in the entire radial distribution is normalized to 1, instead of normalizing to the intensity value at  $r = 0$ . Radially averaged autocorrelation functions were computed using an ImageJ macro ([imagejdocu.tudor.lu/macro/radially\\_averaged\\_autocorrelation](http://imagejdocu.tudor.lu/macro/radially_averaged_autocorrelation)). AiryScan images were used for the autocorrelation of Hb and Kr for their wider field of view compared to STED, in order to include a larger number of nuclei. Intensity distributions and autocorrelation functions were plotted using Matlab (MathWorks, Natick, MA).

## Acknowledgements

The *hunchback* BAC line was a generous gift from Michael Levine. The MCP-EGFP line and the plasmid pIB-hbP2-P2P-lacZ- $\alpha$ Tub3 UTR were generous gifts from Hernan Garcia. The Hunchback and Krüppel primary antibody were generous gifts from Mark Biggin. We would like to thank Marko Lampe at the EMBL Advanced Light Microscopy Facility for his expert advice and training to conduct STED imaging. We would also like to thank members of the Crocker Group for valuable discussions and suggestions to improve the manuscript.

## Funding

Albert Tsai is supported by the German Research Foundation (Deutsche Forschungsgemeinschaft, TS 428/1-1).

Albert Tsai and Justin Crocker are supported by the European Molecular Biology Laboratory (EMBL).

## Data and Material Availability

The original images (AiryScan, confocal, and STED) will be indexed for download at: [https://www.embl.de/download/crocker/nuclear\\_morphogenesis/index.html](https://www.embl.de/download/crocker/nuclear_morphogenesis/index.html). All fly lines and plasmid sequences will be available upon reasonable request.

## References

- Bintu, B., Mateo, L.J., Su, J.H., Sinnott-Armstrong, N.A., Parker, M., Kinrot, S., Yamaya, K., Boettiger, A.N., and Zhuang, X. (2018). Super-resolution chromatin tracing reveals domains and cooperative interactions in single cells. *Science* (80-. ). 362.
- Blom, H., and Widengren, J. (2017). Stimulated Emission Depletion Microscopy. *Chem. Rev.* 117, 7377–7427.
- Bothma, J.P., Garcia, H.G., Ng, S., Perry, M.W., Gregor, T., and Levine, M. (2015). Enhancer additivity and non-additivity are determined by enhancer strength in the *Drosophila* embryo. *Elife* 4.
- Briscoe, J., and Small, S. (2015). Morphogen rules: design principles of gradient-mediated embryo patterning. *Development* 142, 3996–4009.
- Chen, H., Xu, Z., Mei, C., Yu, D., and Small, S. (2012). A System of Repressor Gradients Spatially Organizes the Boundaries of Bicoid-Dependent Target Genes. *Cell* 149, 618–629.
- Chen, H., Levo, M., Barinov, L., Fujioka, M., Jaynes, J.B., and Gregor, T. (2018). Dynamic interplay between

enhancer–promoter topology and gene activity. *Nat. Genet.* *50*, 1296–1303.

Consortium, T.E.P. (2012). An integrated encyclopedia of DNA elements in the human genome. *Nature* *489*, 57–74.

Crocker, J., Abe, N., Rinaldi, L., McGregor, A.P.P., Frankel, N., Wang, S., Alsawadi, A., Valenti, P., Plaza, S., Payre, F., et al. (2015). Low affinity binding site clusters confer hox specificity and regulatory robustness. *Cell* *160*, 191–203.

Denholtz, M., Bonora, G., Chronis, C., Splinter, E., de Laat, W., Ernst, J., Pellegrini, M., and Plath, K. (2013). Long-range chromatin contacts in embryonic stem cells reveal a role for pluripotency factors and polycomb proteins in genome organization. *Cell Stem Cell* *13*, 602–616.

Furlong, E.E.M., and Levine, M. (2018). Developmental enhancers and chromosome topology. *Science* (80-. ). *361*, 1341–1345.

Garcia, H.G., Tikhonov, M., Lin, A., and Gregor, T. (2013). Quantitative Imaging of Transcription in Living *Drosophila* Embryos Links Polymerase Activity to Patterning. *Curr. Biol.* *23*, 2140–2145.

Hammonds, A.S., Bristow, C.A., Fisher, W.W., Weiszmann, R., Wu, S., Hartenstein, V., Kellis, M., Yu, B., Frise, E., and Celniker, S.E. (2013). Spatial expression of transcription factors in *Drosophila* embryonic organ development. *Genome Biol.* *14*, R140.

Ip, Y.T., Park, R.E., Kosman, D., Yazdanbakhsh, K., and Levine, M. (1992a). dorsal-twist interactions establish snail expression in the presumptive mesoderm of the *Drosophila* embryo. *Genes Dev.* *6*, 1518–1530.

Ip, Y.T., Park, R.E., Kosman, D., Bier, E., and Levine, M. (1992b). The dorsal gradient morphogen regulates stripes of rhomboid expression in the presumptive neuroectoderm of the *Drosophila* embryo. *Genes Dev.* *6*, 1728–1739.

Johnson, D.S., Mortazavi, A., Myers, R.M., and Wold, B. (2007). Genome-Wide Mapping of in Vivo Protein-DNA Interactions. *Science* (80-. ). *316*, 1497–1502.

Kambadur, R., Koizumi, K., Stivers, C., Nagle, J., Poole, S.J., and Odenwald, W.F. (1998). Regulation of POU genes by castor and hunchback establishes layered compartments in the *Drosophila* CNS. *Genes Dev.* *12*, 246–260.

Kundaje, A., Meuleman, W., Ernst, J., Bilenky, M., Yen, A., Heravi-Moussavi, A., Kheradpour, P., Zhang, Z., Wang, J., Ziller, M.J., et al. (2015). Integrative analysis of 111 reference human epigenomes. *Nature* *518*, 317–330.

Lecuit, T., and Wieschaus, E. (2000). Polarized Insertion of New Membrane from a Cytoplasmic Reservoir during Cleavage of the *Drosophila* Embryo. *J. Cell Biol.* *150*, 849–860.

Li, X., MacArthur, S., Bourgon, R., Nix, D., Pollard, D.A., Iyer, V.N., Hechmer, A., Simirenko, L., Stapleton, M., Hendriks, C.L.L., et al. (2008). Transcription Factors Bind Thousands of Active and Inactive Regions in the *Drosophila* Blastoderm. *PLoS Biol.* *6*, e27.

Lim, B., Heist, T., Levine, M., and Fukaya, T. (2018). Visualization of Transvection in Living *Drosophila* Embryos. *Mol. Cell* *70*, 287–296.e6.

Long, H.K., Prescott, S.L., and Wysocka, J. (2016). Ever-Changing Landscapes: Transcriptional Enhancers in Development and Evolution. *Cell* *167*, 1170–1187.

Mallo, M., and Alonso, C.R. (2013). The regulation of Hox gene expression during animal development. *Dev.* *140*, 3951–3963.

Mateo, L.J., Murphy, S.E., Hafner, A., Cinquini, I.S., Walker, C.A., and Boettiger, A.N. (2019). Visualizing DNA folding and RNA in embryos at single-cell resolution. *Nature* *568*, 49–54.

Matharu, N., and Ahituv, N. (2015). Minor Loops in Major Folds: Enhancer–Promoter Looping, Chromatin Restructuring, and Their Association with Transcriptional Regulation and Disease. *PLOS Genet.* *11*, e1005640.

McSwiggen, D.T., Hansen, A.S., Teves, S.S., Marie-Nelly, H., Hao, Y., Heckert, A.B., Umemoto, K.K., Dugast-Darzacq, C., Tjian, R., and Darzacq, X. (2019). Evidence for DNA-mediated nuclear compartmentalization distinct from phase separation. *Elife* *8*.

Mir, M., Reimer, A., Haines, J.E., Li, X.-Y., Stadler, M., Garcia, H., Eisen, M.B., and Darzacq, X. (2017). Dense Bicoid



hubs accentuate binding along the morphogen gradient. *Genes Dev.* *31*, 1784–1794.

Mir, M., Stadler, M.R., Ortiz, S.A., Hannon, C.E., Harrison, M.M., Darzacq, X., and Eisen, M.B. (2018). Dynamic multifactor hubs interact transiently with sites of active transcription in *Drosophila* embryos. *Elife* *7*.

Nüsslein-Volhard, C., and Wieschaus, E. (1980). Mutations affecting segment number and polarity in *Drosophila*. *Nature* *287*, 795–801.

Perry, M.W., Boettiger, A.N., Bothma, J.P., and Levine, M. (2010). Shadow Enhancers Foster Robustness of *Drosophila* Gastrulation. *Curr. Biol.* *20*, 1562–1567.

Perry, M.W., Boettiger, A.N., and Levine, M. (2011). Multiple enhancers ensure precision of gap gene-expression patterns in the *Drosophila* embryo. *Proc. Natl. Acad. Sci.* *108*, 13570–13575.

Reiter, F., Wienerroither, S., and Stark, A. (2017). Combinatorial function of transcription factors and cofactors. *Curr. Opin. Genet. Dev.* *43*, 73–81.

Schindelin, J., Arganda-Carreras, I., Frise, E., Kaynig, V., Longair, M., Pietzsch, T., Preibisch, S., Rueden, C., Saalfeld, S., Schmid, B., et al. (2012). Fiji: an open-source platform for biological-image analysis. *Nat Methods* *9*, 676–682.

Schmid, B., Schindelin, J., Cardona, A., Longair, M., and Heisenberg, M. (2010). A high-level 3D visualization API for Java and ImageJ. *BMC Bioinformatics* *11*, 274.

Shema, E., Bernstein, B.E., and Buenrostro, J.D. (2019). Single-cell and single-molecule epigenomics to uncover genome regulation at unprecedented resolution (Nature Publishing Group).

Sheppard, C.J., Mehta, S.B., and Heintzmann, R. (2013). Superresolution by image scanning microscopy using pixel reassignment. *Opt Lett* *38*, 2889–2892.

Spitz, F., and Furlong, E.E.M. (2012). Transcription factors: from enhancer binding to developmental control. *Nat. Rev. Genet.* *13*, 613–626.

Stunnenberg, H.G., International Human Epigenome Consortium, S., Hirst, M., Almeida, M. de, Altucci, L., Amin, V., Amit, I., Antonarakis, S.E., Aparicio, S., Arima, T., et al. (2016). The International Human Epigenome Consortium: A Blueprint for Scientific Collaboration and Discovery. *Cell* *167*, 1145–1149.

Tanay, A., and Regev, A. (2017). Scaling single-cell genomics from phenomenology to mechanism. *Nature* *541*, 331–338.

Thurman, R.E., Rynes, E., Humbert, R., Vierstra, J., Maurano, M.T., Haugen, E., Sheffield, N.C., Stergachis, A.B., Wang, H., Vernot, B., et al. (2012). The accessible chromatin landscape of the human genome. *Nature* *489*, 75–82.

Tomancak, P., Beaton, A., Weiszmam, R., Kwan, E., Shu, S.Q., Lewis, S.E., Richards, S., Ashburner, M., Hartenstein, V., Celniker, S.E., et al. (2002). Systematic determination of patterns of gene expression during *Drosophila* embryogenesis. *Genome Biol.* *3*, 1–14.

Tomancak, P., Berman, B.P., Beaton, A., Weiszmam, R., Kwan, E., Hartenstein, V., Celniker, S.E., and Rubin, G.M. (2007). Global analysis of patterns of gene expression during *Drosophila* embryogenesis. *Genome Biol.* *8*, R145.

Tsai, A., Muthusamy, A.K., Alves, M.R., Lavis, L.D., Singer, R.H., Stern, D.L., and Crocker, J. (2017). Nuclear microenvironments modulate transcription from low-affinity enhancers. *Elife* *6*.

## Figures

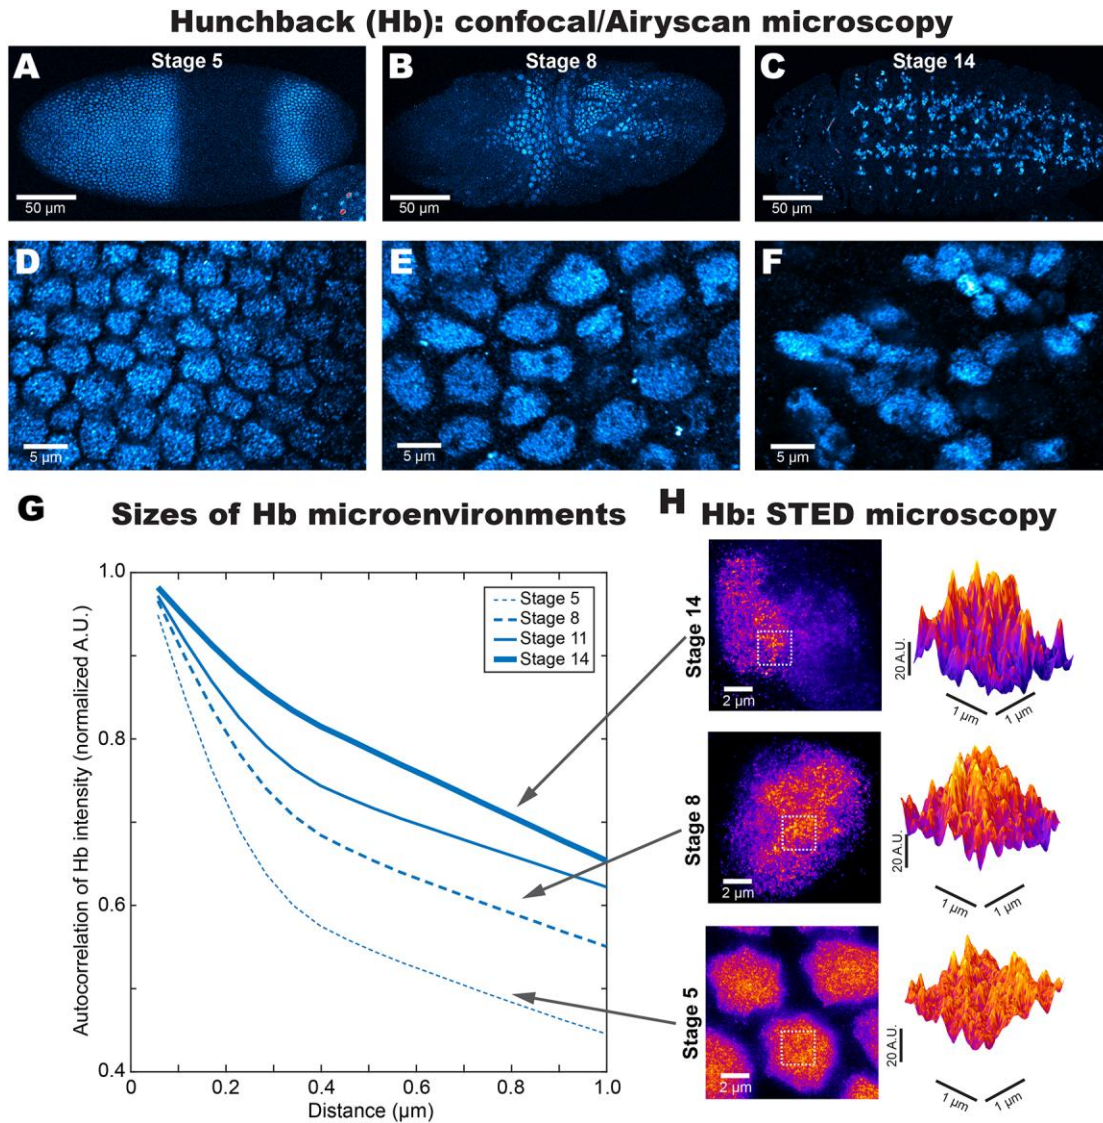

**Figure 1:** Increasing heterogeneity of Hunchback (Hb) distribution as embryo development progresses

The distribution of Hb in *Drosophila* embryos from (A) stage 5, (B) stage 8, and (C) stage 14. (D-F) A zoomed-in view of the nuclear distribution of Hb using AiryScan from the panels above. (G) The radially averaged autocorrelation function of Hb. See Figure S1 A-C for how to interpret autocorrelation plots. (H) STED microscopy of nuclei from stage 5 (bottom), stage 8 (middle), and stage 14 (top).

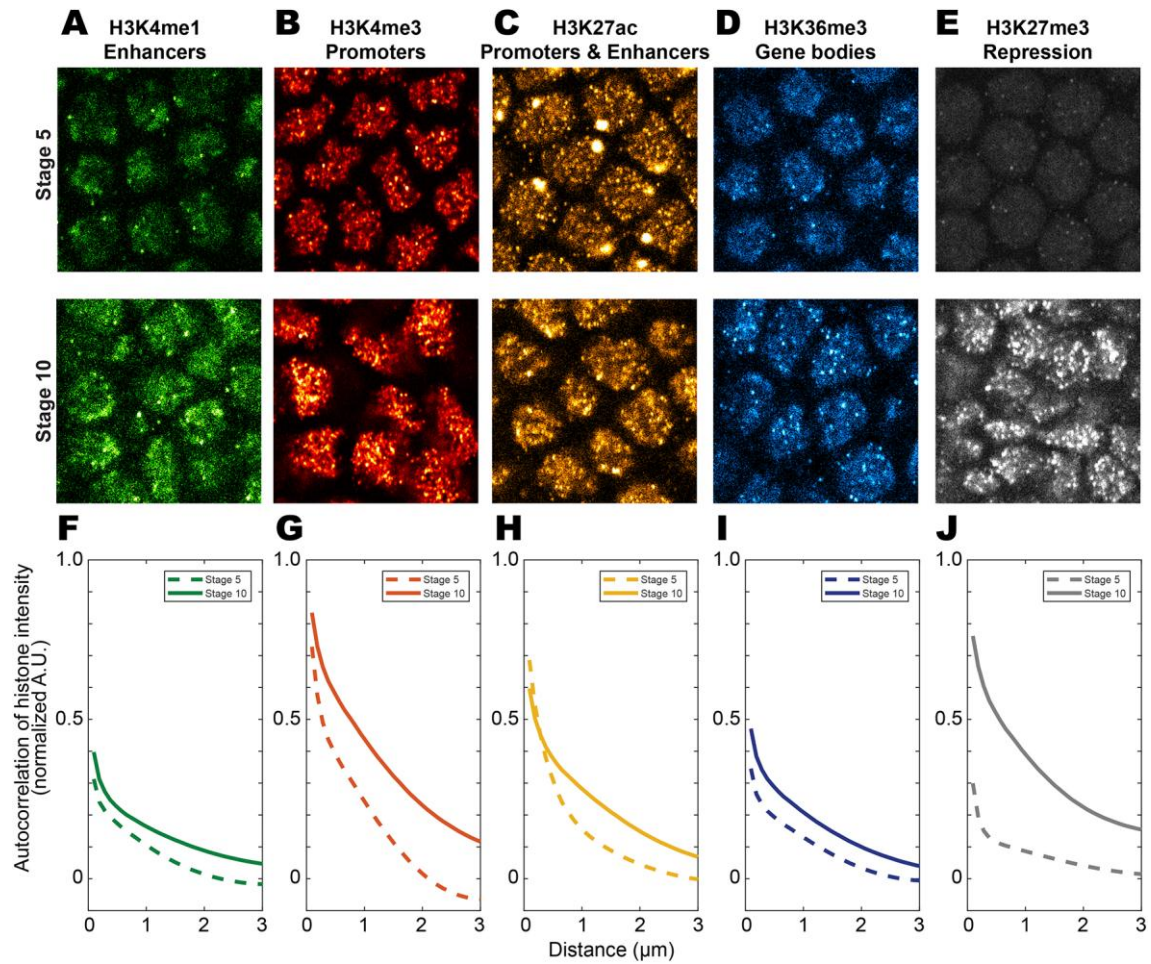

**Figure 2:** Increasing levels histone modifications as a function of embryo age

(A-E) The levels of histone modifications of embryos at stages 5 and 10. (A) H3K4me1 (enhancers), (B) H3K4me3 (promoters), (C) H3K27ac (active enhancers and promoters), (D) H3K36me3 (active gene bodies), and (E) H3K27me3 (repressed regions) were imaged. (F-J) The autocorrelation functions of the histone modifications. All images are taken from regions with active *hbBAC* transcription sites.



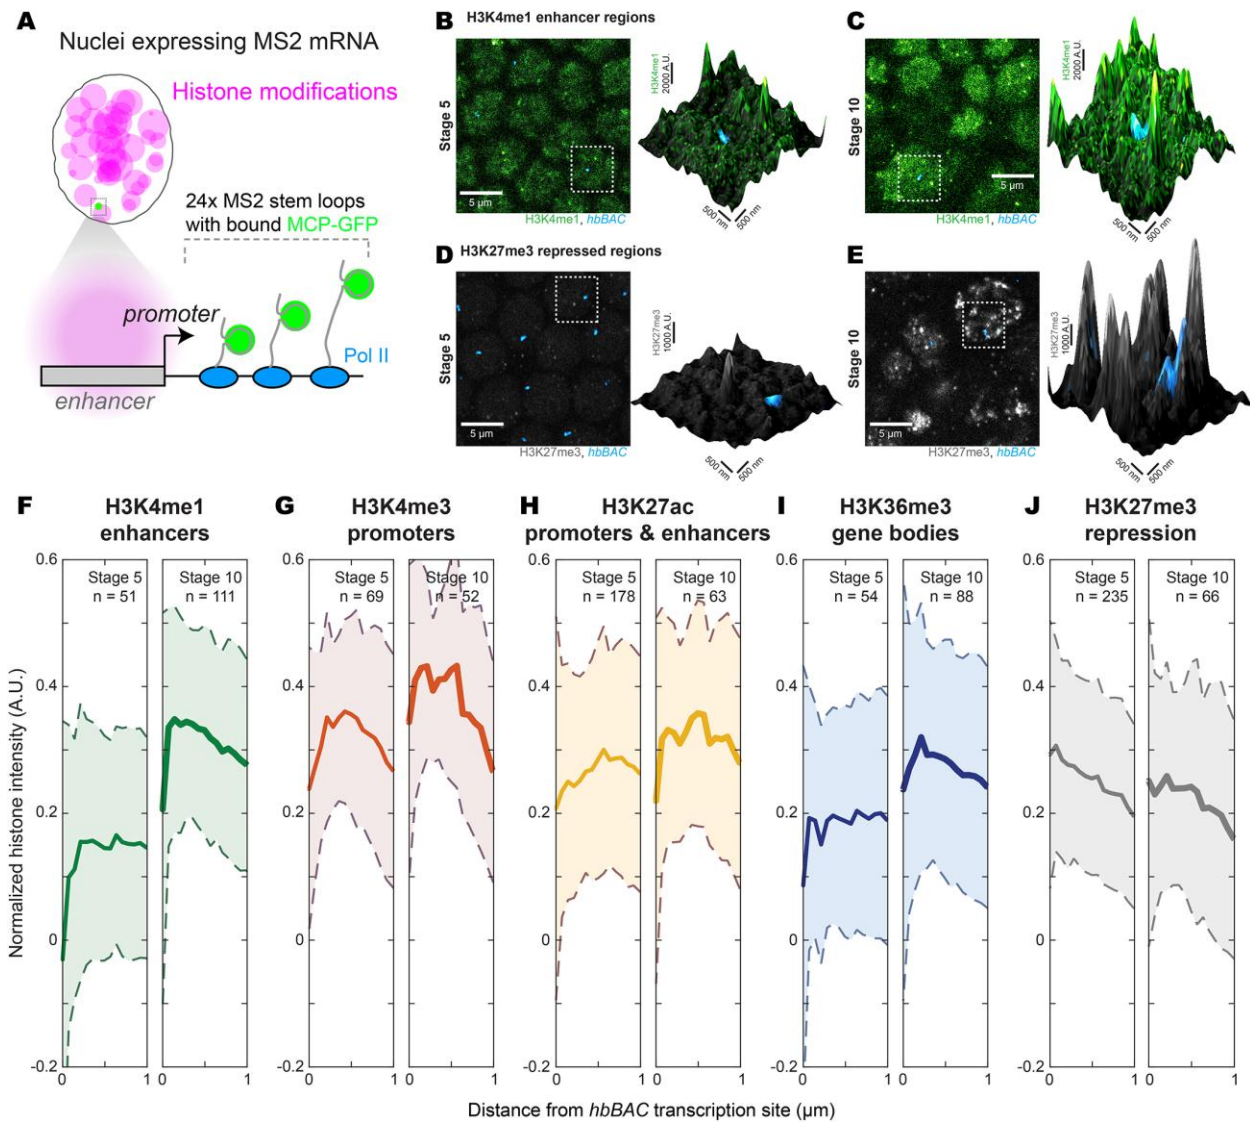

**Figure 3:** Temporal changes in the histone environments at *hbBAC* transcription sites

(A) Marking transcription sites of a MS2 reporter gene driven by a *cis*-regulatory region using MCP-GFP and immunofluorescence (IF) amplification preserves the signal of histone modifications. (B&C) is H3K4me1 and (D&E) is H3K27me3, at stages 5 and 10, respectively. See Figure S2 for a comparison with FISH. (F-J) The radially averaged distributions of histone modifications around *hbBAC* transcription sites. Number of transcription sites (*n*) is indicated in the figure panels. The line is the mean, the shaded region is the variance.

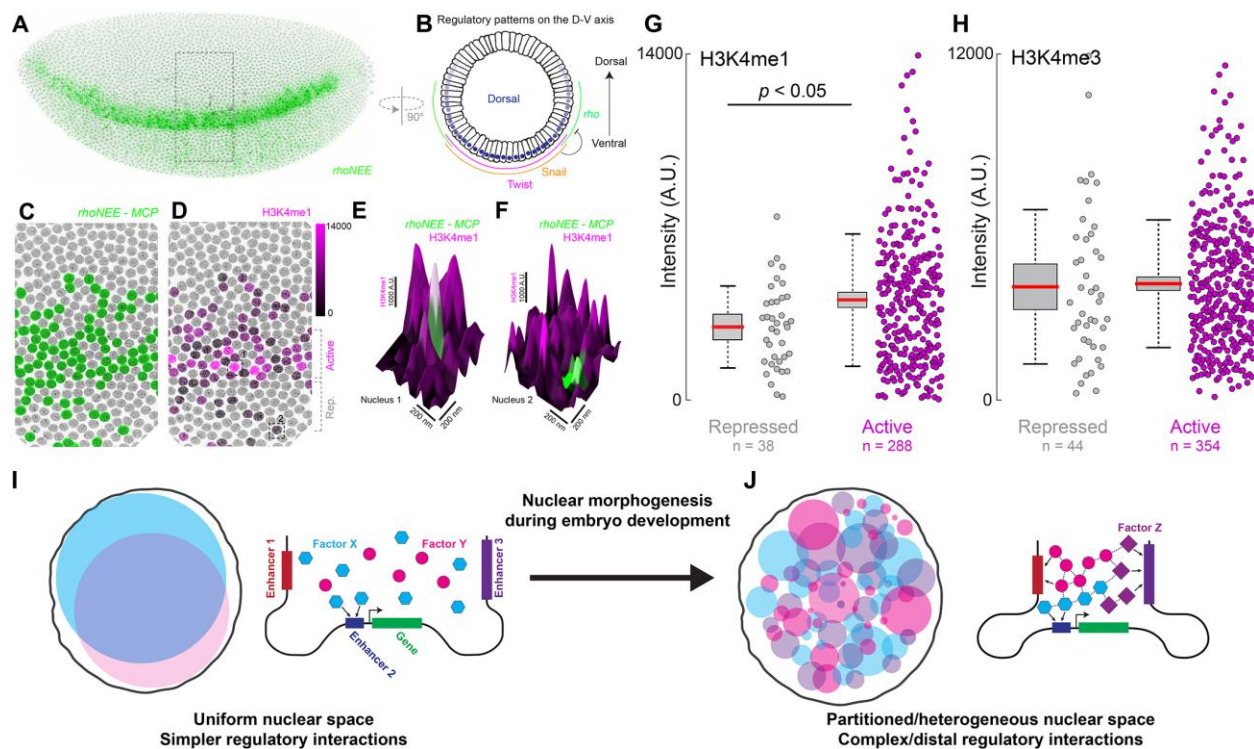

**Figure 4:** The histone environment at *rho* transcription sites depends on their location in the embryo

(A) The expression pattern of *rhoNEE::MS2* mRNA on a side view of a stage 5 embryo. (B) The regulatory inputs of *rho* along the dorsal-ventral axis. Dorsal drives *rho* expression whereas Snail represses *rho*. (C) Zoomed panel from the box in (A) with nuclei transcribing *rhoNEE::MS2* mRNA in green. (D) Same view as (C) with the shade of magenta depicting the intensity of H3K4me1 at the transcription site. The active and repressed zones for *rho* expression are indicated to the right. (E & F) Zoomed in view of a nucleus from the (E) active and (F) repressed zone. (G & H) Quantification of (G) H3K4me1 and (H) H3K4me3 levels at *rhoNEE* transcription sites at early cellularization (see Figure S3A). Number of transcription sites (*n*) is indicated in the figure panels. Red bar is the mean, the gray box is 1 s.d. and the dotted line are 2 s.d. *p* values from 2-tailed Student's *t*-test. Only pairs with  $p < 0.05$  are shown. (I) The nuclear environment in early embryo development is more uniform and gene regulation

may preferentially occur using fewer and more proximal regulatory elements. (J) The space inside the nucleus undergoes “morphogenesis” during embryo development, transforming it into a heterogeneous/partitioned space. Increased spatial organization during the later stages may permit complex and long-distance interactions from *cis*-regulatory regions.

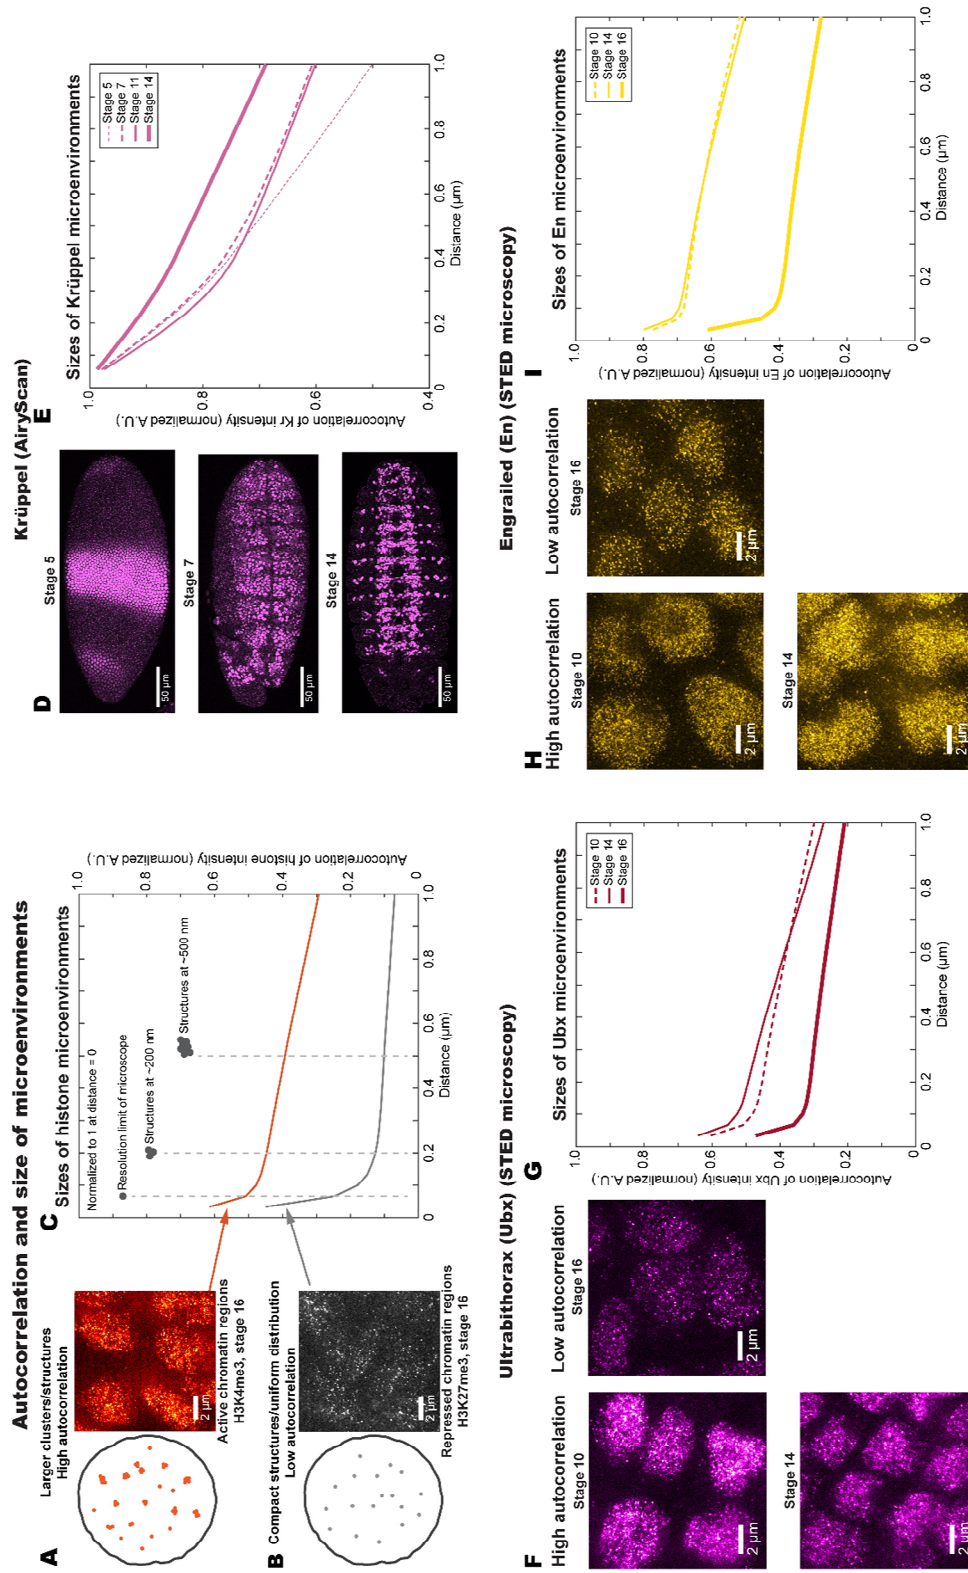

## Fig. S1. Reading autocorrelation plots and the spatial scales of transcription factors as a function of embryo age

Related to Figure 1. (A-C) Spatial autocorrelation is a method used in geographical analysis to extract spatial features of specific sizes and quantitatively analyze spatial statistics, see, for example (Griffith, 2003), for a comprehensive treatment of the topic. In brief, the spatial autocorrelation function is calculated by taking the original image, shifting it by a given distance, and then multiplying the shifted image to the original. This product, after normalization, is the correlation of the function with itself (autocorrelation, y-axis) at that distance (x-axis). As a structure will still overlap with itself when the image is shifted by a distance comparable to its size, autocorrelation gives the relative abundance of structures/spatial features at different length scales. Panels (A-C) use histone modifications associated with open or compacted chromatin as an illustrative example (Boettiger et al., 2016; Szabo et al., 2018). (A) Transcriptionally active chromatin regions marked with H3K4me3 are relatively open, forming clusters and structures of multiple sizes that are larger than the resolution limit of the microscope (represented by a single dot in the schematic diagram). (B) Repressed chromatin regions marked with H3K27me3 are compact, with few clusters and structures larger than the resolution limit of the microscope. (C) Accordingly, the autocorrelation function of H3K4me3 shows higher correlation (y-axis) at all length scales (x-axis) versus H3K27me3. The autocorrelation plots are normalized to 1 when the distance is 0, i.e. the product of the image to an un-shifted copy. In general, the immediate drop-off in autocorrelation at the beginning of the plot reflects the resolution limit of the microscopy technique. The subsequent correlation values show the relative abundance of clusters and structures at the length scales in question. The length scales of 200 nm and 500 nm are each marked with a dotted line. (D) The distribution of another transcription factor expressed during multiple stages of embryo development Krüppel (Kr) also becomes more lineage specific as development progresses. (E) The autocorrelation function for Kr increases at longer length scales for later developmental stages. Transcription factors that are only expressed within a narrower window of embryo development, such as (F & G) Ultrabithorax (Ubx) and (H & I) Engrailed (En), show only two distinct autocorrelation states: high or low, without intermediate states as observed for Hb and Kr.



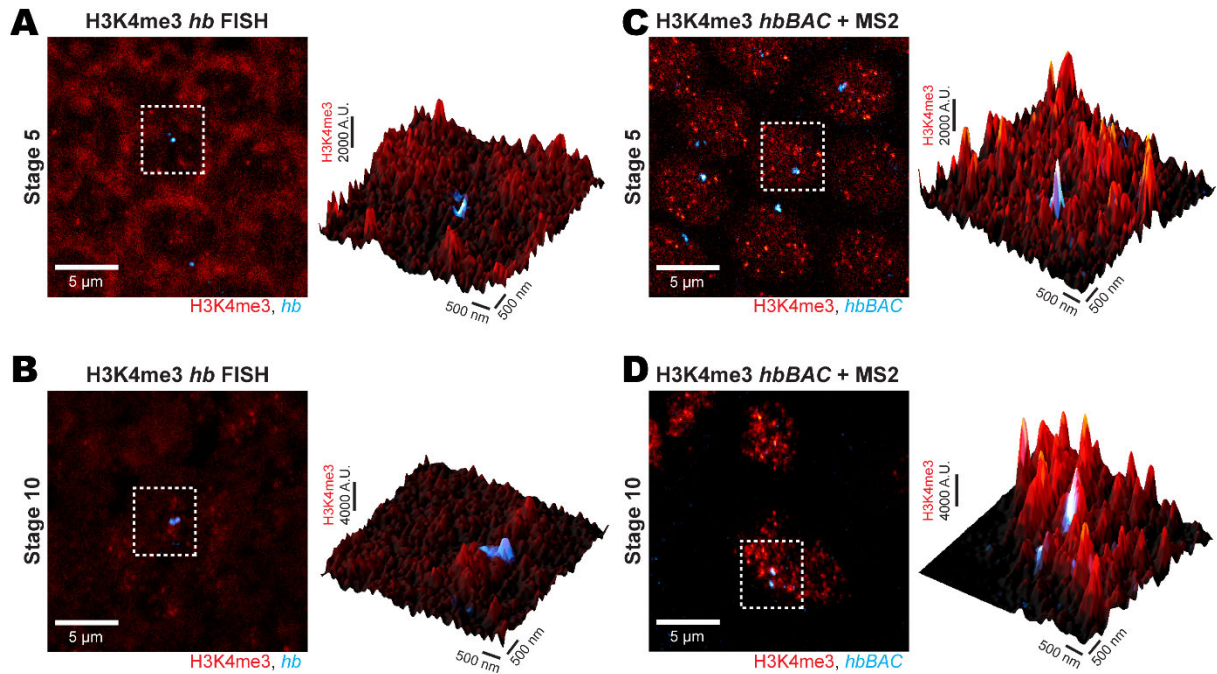

**Fig. S2. Comparison of histone modification signals between transcription sites detection using FISH and MS2**

Related to Figure 3. (A & B) Detection of *hb* transcription sites using fluorescence *in situ* hybridization (FISH) degrades the signal level from IF staining against histone modifications (H3K4me3 shown). (A) At stage 5, when histone modification levels are low, essentially no signal is detected for H3K4me3 inside the nucleus. (B) Only weak signals can be detected inside the nucleus at stage 10. (C & D) In contrast, IF detection of the transcription site using a MS2 reporter mRNA with MCP-GFP preserves the signals for histone modifications. The LUT intensity map is the same between A & C and between B & D.

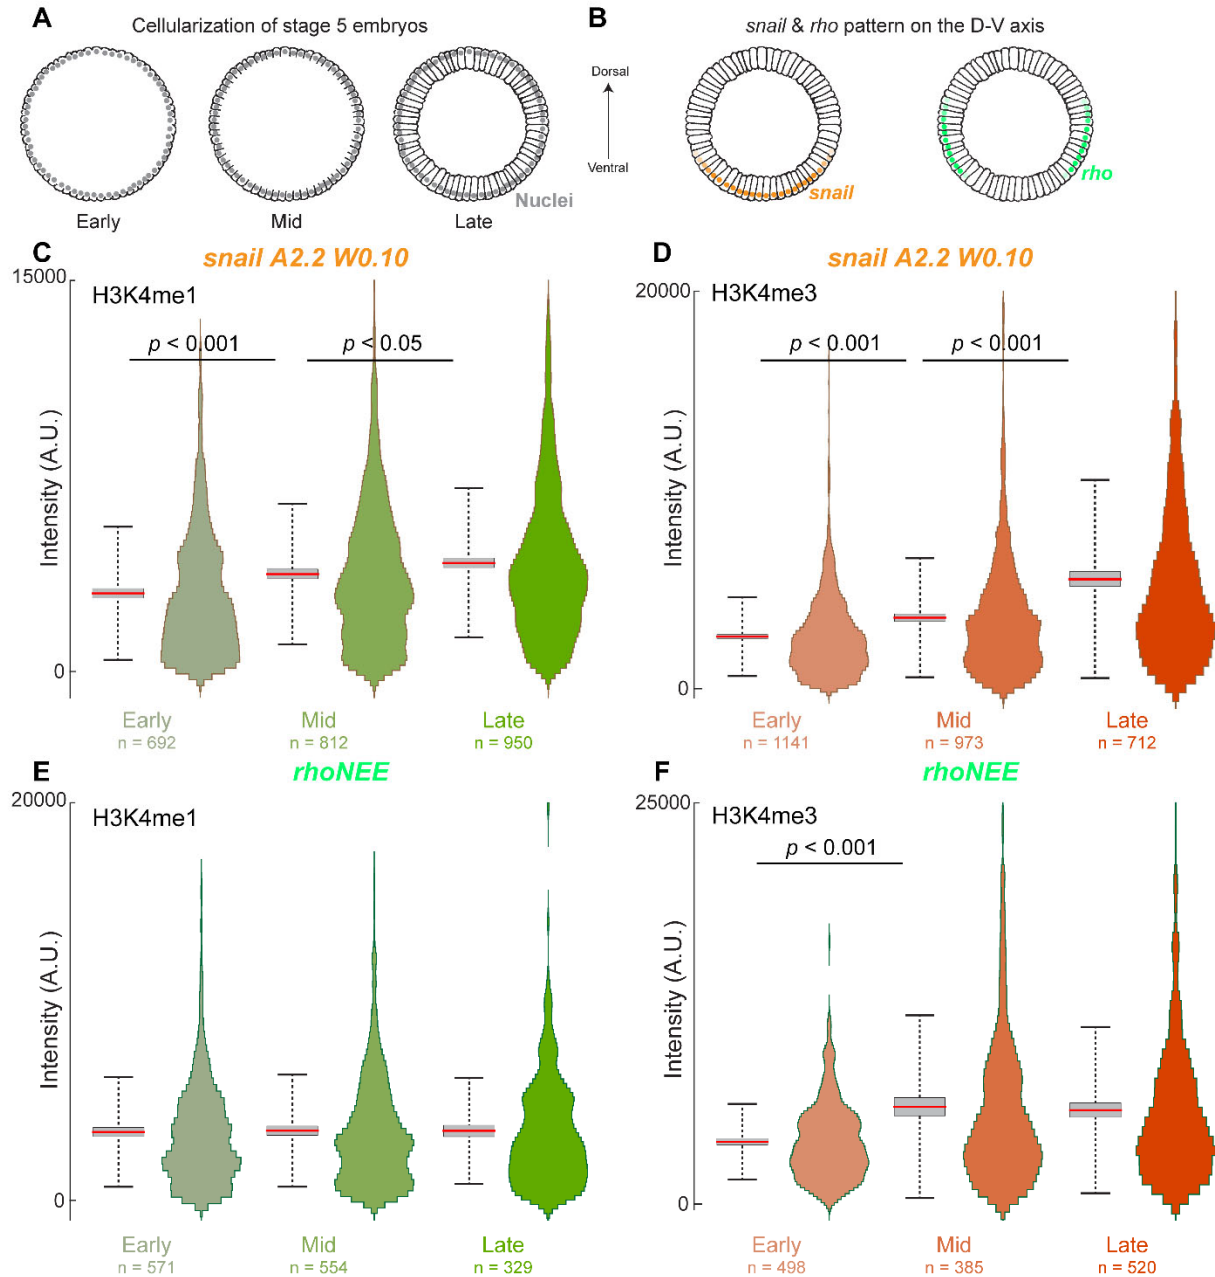

**Fig. S3. Fine temporal changes in the histone environments at *snail A2.2 W0.10* and *rhoNEE* transcription sites**

Related to Figure 4. (A) Stages of cellularization in stage 5 embryos, early: cell membranes begin to form, mid: cell membranes mid-way through enveloping the nuclei, and late: cellularization completed. (B) The expression patterns of the endogenous *snail* and *rho* genes along the dorsal-ventral axis, which the *snail A2.2 W0.10* and *rhoNEE* controlled transgenes recapitulate. (C-F) The distributions of H3K4me1 and H3K4me3 intensity at transcription sites of *snail A2.2 W0.10* and *rhoNEE* during cellularization. Number of transcription sites (*n*) is indicated in the figure panels. Red bar is the mean, the gray box is 1 s.d. and the black bars at the end of the dotted line are 2 s.d. *p* values from 2-tailed Student's *t*-test, only pairs with *p*<0.05 are shown.

## Supplementary references

Boettiger, A.N., Bintu, B., Moffitt, J.R., Wang, S., Beliveau, B.J., Fudenberg, G., Imakaev, M., Mirny, L.A., Wu, C., and Zhuang, X. (2016). Super-resolution imaging reveals distinct chromatin folding for different epigenetic states. *Nature* 529, 418–422.

Griffith, D.A. (2003). *Spatial Autocorrelation and Spatial Filtering* (Berlin, Heidelberg: Springer Berlin Heidelberg).

Szabo, Q., Jost, D., Chang, J.M., Cattoni, D.I., Papadopoulos, G.L., Bonev, B., Sexton, T., Gurgo, J., Jacquier, C., Nollmann, M., et al. (2018). TADs are 3D structural units of higher-order chromosome organization in *Drosophila*. *Sci. Adv.* 4, eaar8082.
